# Supplementary material for: Molecular genetic and physical analysis of gas vesicles in buoyant enterobacteria
Source: PubMed Central journal article supplement (PMC4982088; doi:10.1111/1462-2920.13203), 2016-02-15
Supplement: EMI-18-1264-s001.pdf [file EMI-18-1264-s001.pdf]

GvpA

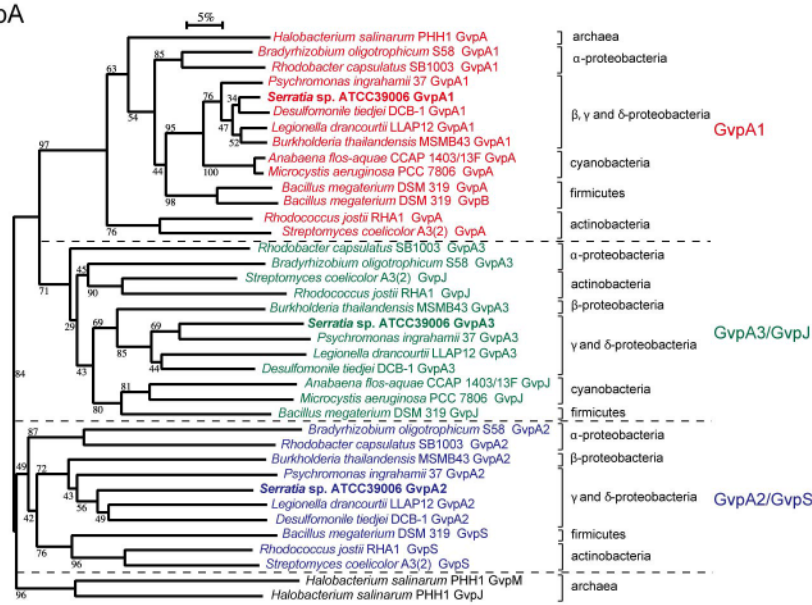

GvpC

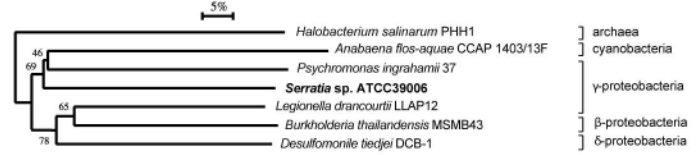

GvpG

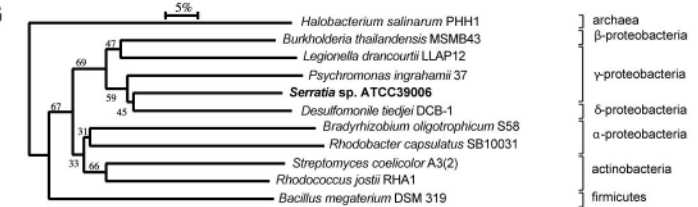

GvpH

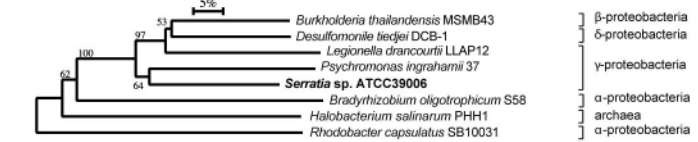

GvpK

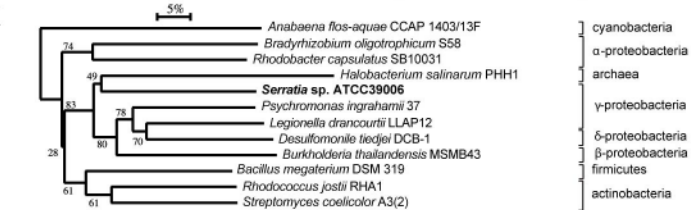

GvpN

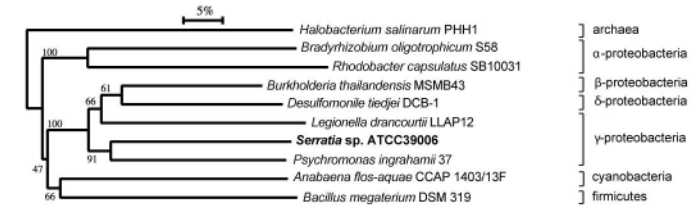

GvpV

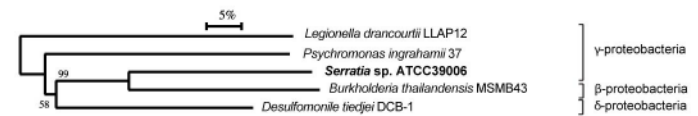

GvpZ

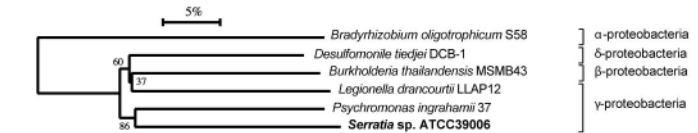

GvpF/L

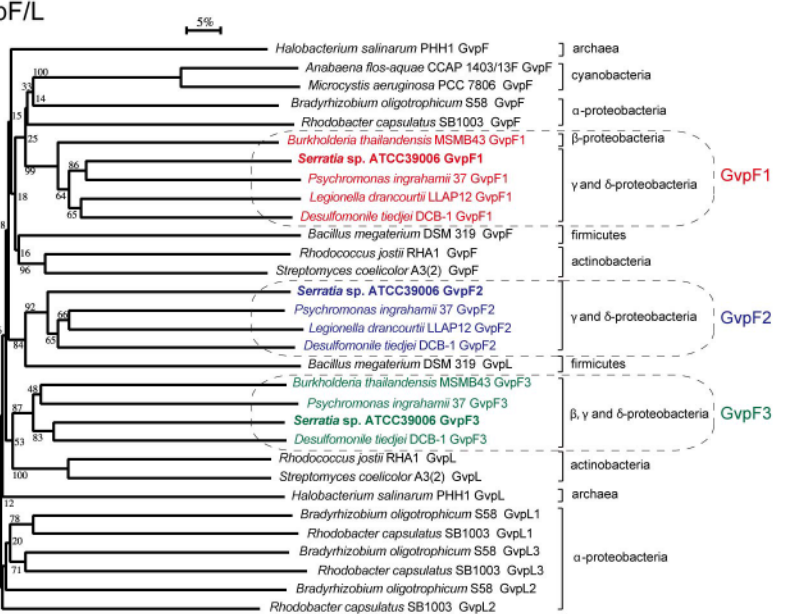

Figure S1

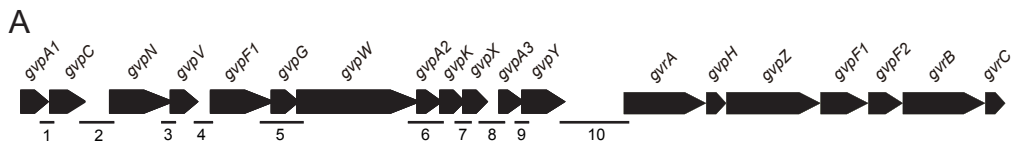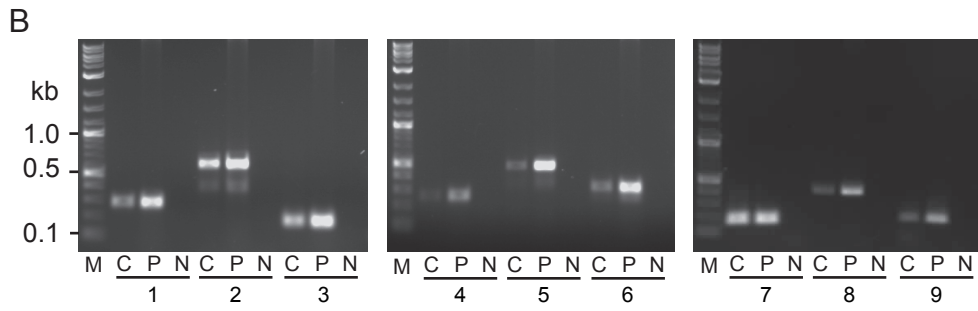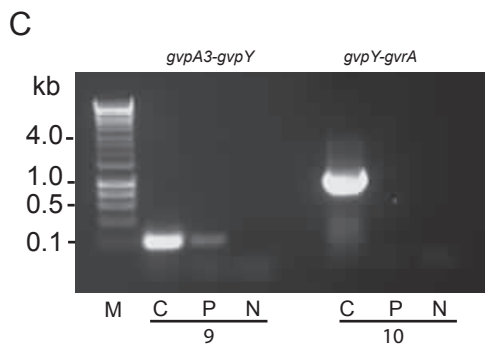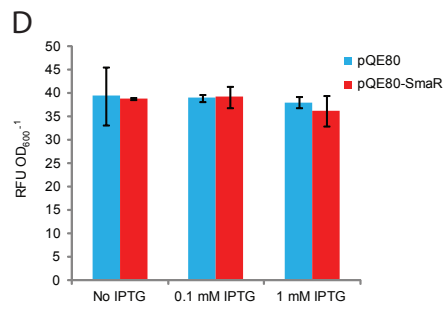

Figure S2

**A**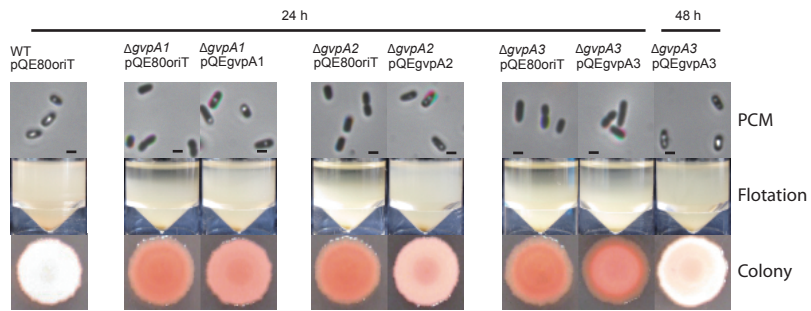**B**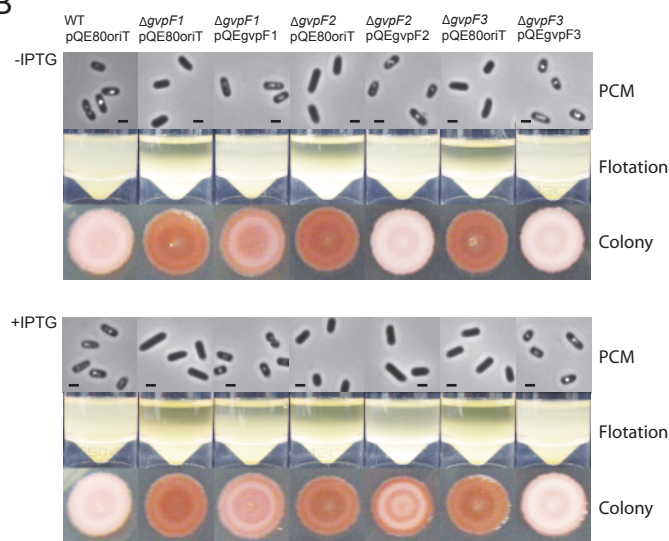**C**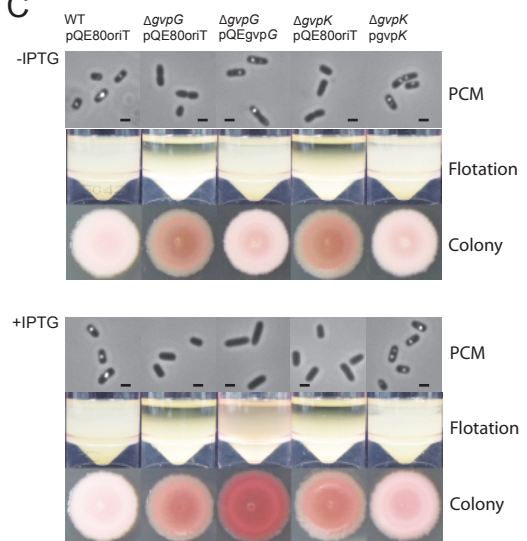**D**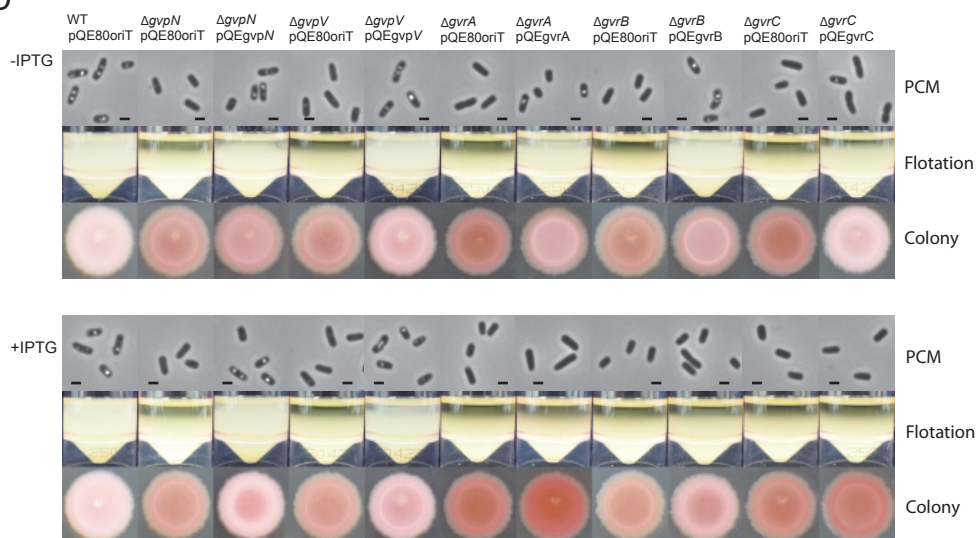

Figure S3

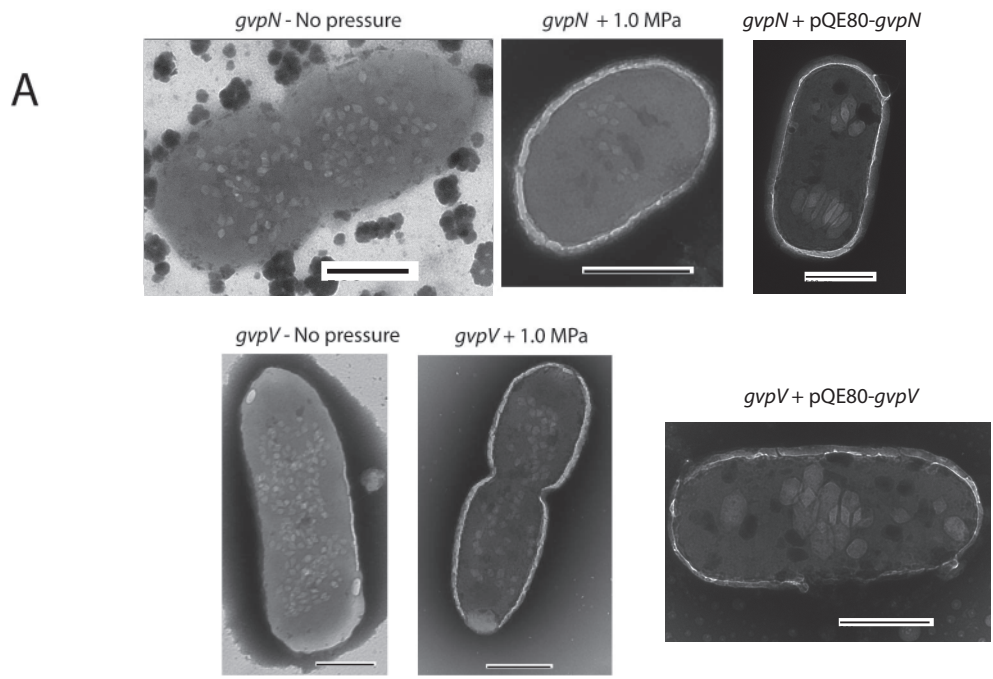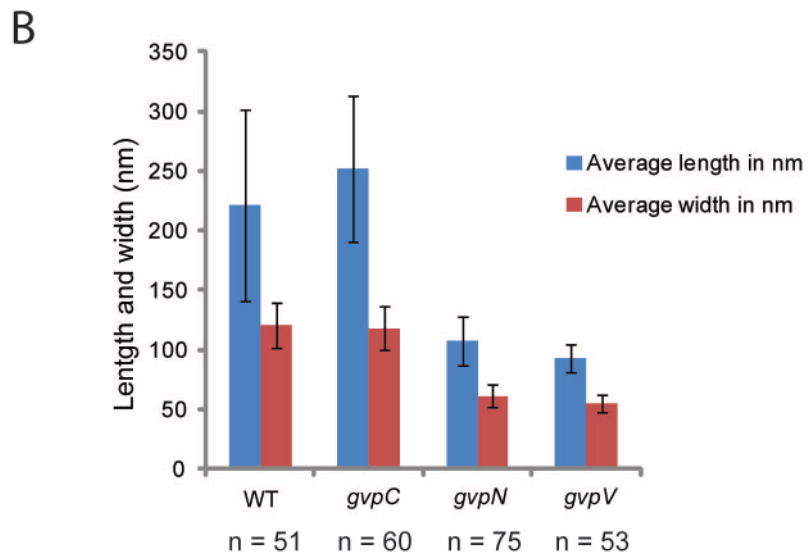

Figure S4

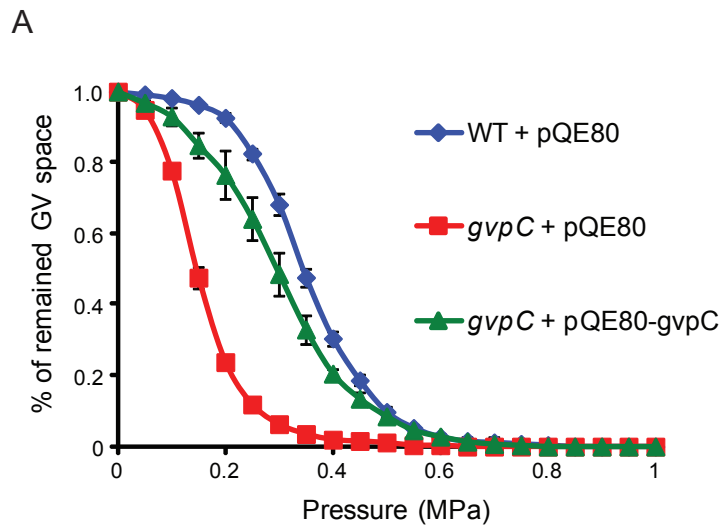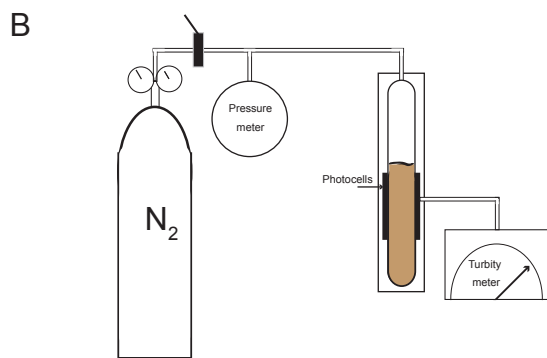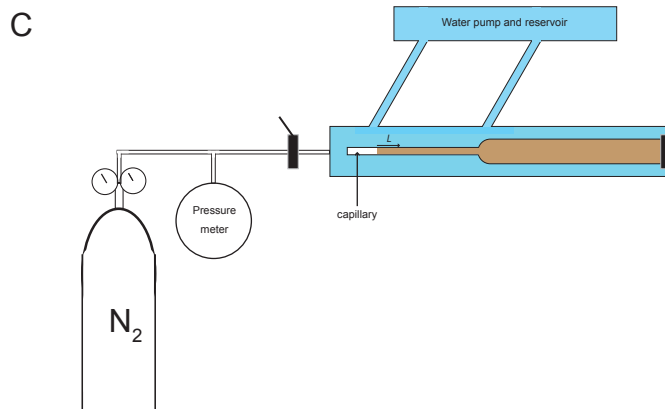

Figure S5

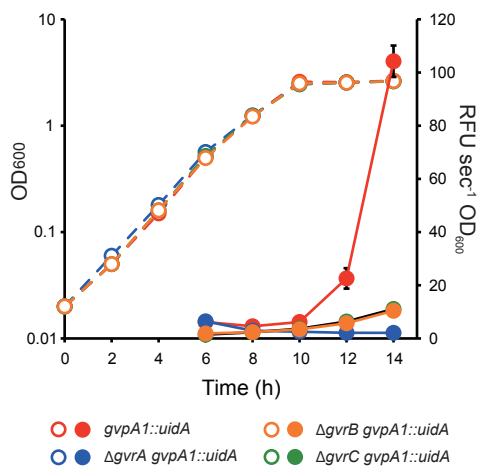

Figure S6
