# Supplementary material for: Molecular genetic and physical analysis of gas vesicles in buoyant enterobacteria
Source: PubMed Central journal article supplement (PMC4982088; doi:10.1111/1462-2920.13203), 2016-02-15
Supplement: EMI-18-1264-s002.pdf [file EMI-18-1264-s002.pdf]

Table S1 Comparison of Amino Acid Sequences of GvpA and GvpF proteins from S39006

A) Comparison of GvpA amino acid sequences from S39006

|       | GvpA2       | GvpA3      |
|-------|-------------|------------|
| GvpA1 | (35% , 64%) | (39%, 71%) |
| GvpA2 |             | (34%, 60%) |

B) Comparison of GvpF amino acid sequences from S39006

|       | GvpF2      | GvpF3      |
|-------|------------|------------|
| GvpF1 | (23%, 43%) | (22%, 54%) |
| GvpF2 |            | (21%, 37%) |

Numbers indicate (% identity, % similarity)
