# Supplementary material for: Molecular genetic and physical analysis of gas vesicles in buoyant enterobacteria
Source: PubMed Central journal article supplement (PMC4982088; doi:10.1111/1462-2920.13203), 2016-02-15
Supplement: EMI-18-1264-s003.pdf [file EMI-18-1264-s003.pdf]

Table S2 Bacterial strains and plasmids used in this study

| Strains/plasmids                          | Genotype or description                                                                                                                                                               | Reference          |
|-------------------------------------------|---------------------------------------------------------------------------------------------------------------------------------------------------------------------------------------|--------------------|
| <i>Serratia</i> sp.                       |                                                                                                                                                                                       |                    |
| ATCC39006                                 | From ATCC                                                                                                                                                                             | Parker WL 1982     |
| LacA (WT)                                 | Laboratory strain, referred to as wild type (WT) in text, Lac-derivative of ATCC S39006                                                                                               |                    |
| $\Delta$ gvpA1                            | In-frame <i>gvpA1</i> mutant derivative of WT, made using plasmid pKNG101- $\Delta$ gvpA1                                                                                             | This study         |
| $\Delta$ avoA2                            | In-frame <i>avoA2</i> mutant derivative of WT, made using plasmid pKNG101- $\Delta$ avoA2                                                                                             | This study         |
| $\Delta$ avoA3                            | In-frame <i>avoA3</i> mutant derivative of WT, made using plasmid pKNG101- $\Delta$ avoA3                                                                                             | This study         |
| $\Delta$ gvpC                             | In-frame <i>gvpC</i> mutant derivative of WT, made using plasmid pKNG101- $\Delta$ gvpC                                                                                               | This study         |
| $\Delta$ gvpF1                            | In-frame <i>gvpF1</i> mutant derivative of WT, made using plasmid pKNG101- $\Delta$ gvpF1                                                                                             | This study         |
| $\Delta$ avoF2                            | In-frame <i>avoF2</i> mutant derivative of WT, made using plasmid pKNG101- $\Delta$ avoF2                                                                                             | This study         |
| $\Delta$ avoF3                            | In-frame <i>avoF3</i> mutant derivative of WT, made using plasmid pKNG101- $\Delta$ avoF3                                                                                             | This study         |
| $\Delta$ gvpG                             | In-frame <i>gvpG</i> mutant derivative of WT, made using plasmid pKNG101- $\Delta$ gvpG                                                                                               | This study         |
| $\Delta$ gvpH                             | In-frame <i>gvpH</i> mutant derivative of WT, made using plasmid pKNG101- $\Delta$ gvpH                                                                                               | This study         |
| $\Delta$ gvpK                             | In-frame <i>gvpK</i> mutant derivative of WT, made using plasmid pKNG101- $\Delta$ gvpK                                                                                               | This study         |
| $\Delta$ gvpN                             | In-frame <i>gvpN</i> mutant derivative of WT, made using plasmid pKNG101- $\Delta$ gvpN                                                                                               | This study         |
| $\Delta$ gvpV                             | In-frame <i>gvpV</i> mutant derivative of WT, made using plasmid pKNG101- $\Delta$ gvpV                                                                                               | This study         |
| $\Delta$ gvpW                             | In-frame <i>gvpW</i> mutant derivative of WT, made using plasmid pKNG101- $\Delta$ gvpW                                                                                               | This study         |
| $\Delta$ gvpX                             | In-frame <i>gvpX</i> mutant derivative of WT, made using plasmid pKNG101- $\Delta$ gvpX                                                                                               | This study         |
| $\Delta$ gvpY                             | In-frame <i>gvpY</i> mutant derivative of WT, made using plasmid pKNG101- $\Delta$ gvpY                                                                                               | This study         |
| $\Delta$ gvpZ                             | In-frame <i>gvpZ</i> mutant derivative of WT, made using plasmid pKNG101- $\Delta$ gvpZ                                                                                               | This study         |
| $\Delta$ gvrA                             | In-frame <i>gvrA</i> mutant derivative of WT, made using plasmid pKNG101- $\Delta$ gvrA                                                                                               | This study         |
| $\Delta$ gvrB                             | In-frame <i>gvrB</i> mutant derivative of WT, made using plasmid pKNG101- $\Delta$ gvrB                                                                                               | This study         |
| $\Delta$ gvrC                             | In-frame <i>gvrC</i> mutant derivative of WT, made using plasmid pKNG101- $\Delta$ gvrC                                                                                               | This study         |
| GPA1                                      | <i>gvpA1</i> ::Tn-DS1028- <i>uidA</i> derivative of WT, Cm <sup>R</sup>                                                                                                               | Ramsay JP 2011     |
| $\Delta$ gvrA <i>gvpA1</i> :: <i>uidA</i> | In-frame <i>gvrA</i> mutant derivative of GPA1                                                                                                                                        | This study         |
| $\Delta$ gvrB <i>gvpA1</i> :: <i>uidA</i> | In-frame <i>gvrB</i> mutant derivative of GPA1                                                                                                                                        | This study         |
| $\Delta$ gvrC <i>gvpA1</i> :: <i>uidA</i> | In-frame <i>gvrC</i> mutant derivative of GPA1                                                                                                                                        | This study         |
| <i>Escherichia coli</i>                   |                                                                                                                                                                                       |                    |
| DH5 $\alpha$                              | <i>supE44</i> , $\Delta$ <i>lac</i> U169, $\Phi$ 80 <i>lacZ</i> $\Delta$ M15, <i>hsdR17</i> , <i>recA1</i> , <i>endA1</i> , <i>gyrA96</i> , <i>thi-1</i> , <i>relA1</i> , <i>luxS</i> |                    |
| $\beta$ 2163                              | (F-) RP4-2-Tc::Mu <i>dapA</i> ::( <i>erm</i> - <i>pir</i> )                                                                                                                           |                    |
| Plasmids                                  |                                                                                                                                                                                       |                    |
| pQE80oriT                                 | Expression vector pQE80L containing the RK2 origin, Ap <sup>R</sup>                                                                                                                   | Ramsay JP 2011     |
| pKNG101                                   | Marker exchange suicide vector, <i>sacBR</i> , <i>mobRK2</i> , <i>oriR6K</i> , Sm <sup>R</sup>                                                                                        | Kaniga 1991        |
| pKNG101- $\Delta$ gvpA1                   | pKNG101 marker exchange construct containing $\Delta$ <i>gvpA1</i>                                                                                                                    | This study         |
| pKNG101- $\Delta$ gvpA2                   | pKNG101 marker exchange construct containing $\Delta$ <i>gvpA2</i>                                                                                                                    | This study         |
| pKNG101- $\Delta$ gvpA3                   | pKNG101 marker exchange construct containing $\Delta$ <i>gvpA3</i>                                                                                                                    | This study         |
| pKNG101- $\Delta$ gvpC                    | pKNG101 marker exchange construct containing $\Delta$ <i>gvpC</i>                                                                                                                     | This study         |
| pKNG101- $\Delta$ gvpF1                   | pKNG101 marker exchange construct containing $\Delta$ <i>gvpF1</i>                                                                                                                    | This study         |
| pKNG101- $\Delta$ gvpF2                   | pKNG101 marker exchange construct containing $\Delta$ <i>gvpF2</i>                                                                                                                    | This study         |
| pKNG101- $\Delta$ gvpF3                   | pKNG101 marker exchange construct containing $\Delta$ <i>gvpF3</i>                                                                                                                    | This study         |
| pKNG101- $\Delta$ gvpG                    | pKNG101 marker exchange construct containing $\Delta$ <i>gvpG</i>                                                                                                                     | This study         |
| pKNG101- $\Delta$ gvpH                    | pKNG101 marker exchange construct containing $\Delta$ <i>gvpH</i>                                                                                                                     | This study         |
| pKNG101- $\Delta$ gvpK                    | pKNG101 marker exchange construct containing $\Delta$ <i>gvpK</i>                                                                                                                     | This study         |
| pKNG101- $\Delta$ gvpN                    | pKNG101 marker exchange construct containing $\Delta$ <i>gvpN</i>                                                                                                                     | This study         |
| pKNG101- $\Delta$ gvpV                    | pKNG101 marker exchange construct containing $\Delta$ <i>gvpV</i>                                                                                                                     | This study         |
| pKNG101- $\Delta$ gvpW                    | pKNG101 marker exchange construct containing $\Delta$ <i>gvpW</i>                                                                                                                     | This study         |
| pKNG101- $\Delta$ gvpX                    | pKNG101 marker exchange construct containing $\Delta$ <i>gvpX</i>                                                                                                                     | This study         |
| pKNG101- $\Delta$ gvpY                    | pKNG101 marker exchange construct containing $\Delta$ <i>gvpY</i>                                                                                                                     | This study         |
| pKNG101- $\Delta$ gvpZ                    | pKNG101 marker exchange construct containing $\Delta$ <i>gvpZ</i>                                                                                                                     | This study         |
| pKNG101- $\Delta$ gvrA                    | pKNG101 marker exchange construct containing $\Delta$ <i>gvrA</i>                                                                                                                     | This study         |
| pKNG101- $\Delta$ gvrB                    | pKNG101 marker exchange construct containing $\Delta$ <i>gvrB</i>                                                                                                                     | This study         |
| pKNG101- $\Delta$ gvrC                    | pKNG101 marker exchange construct containing $\Delta$ <i>gvrC</i>                                                                                                                     | This study         |
| pQE80oriT-gvpA1                           | pQE80oriT containing SD sequence and ORF of <i>gvpA1</i> as a EcoRI-HindIII fragment                                                                                                  | This study         |
| pQE80oriT-gvpA2                           | pQE80oriT containing SD sequence and ORF of <i>gvpA2</i> as a EcoRI-HindIII fragment                                                                                                  | This study         |
| pQE80oriT-gvpA3                           | pQE80oriT containing SD sequence and ORF of <i>gvpA3</i> as a EcoRI-HindIII fragment                                                                                                  | This study         |
| pQE80oriT-gvpC                            | pQE80oriT containing SD sequence and ORF of <i>gvpC</i> as a EcoRI-HindIII fragment                                                                                                   | This study         |
| pQE80oriT-gvpF1                           | pQE80oriT containing SD sequence and ORF of <i>gvpF1</i> as a EcoRI-HindIII fragment                                                                                                  | This study         |
| pQE80oriT-gvpF2                           | pQE80oriT containing SD sequence and ORF of <i>gvpF2</i> as a EcoRI-Sall fragment                                                                                                     | This study         |
| pQE80oriT-gvpF3                           | pQE80oriT containing SD sequence and ORF of <i>gvpF3</i> as a EcoRI-HindIII fragment                                                                                                  | This study         |
| pQE80oriT-gvpG                            | pQE80oriT containing SD sequence and ORF of <i>gvpG</i> as a EcoRI-HindIII fragment                                                                                                   | This study         |
| pQE80oriT-gvpK                            | pQE80oriT containing SD sequence and ORF of <i>gvpK</i> as a EcoRI-HindIII fragment                                                                                                   | This study         |
| pQE80oriT-gvpN                            | pQE80oriT containing SD sequence and ORF of <i>gvpN</i> as a EcoRI-HindIII fragment                                                                                                   | This study         |
| pQE80oriT-gvpV                            | pQE80oriT containing SD sequence and ORF of <i>gvpV</i> as a EcoRI-HindIII fragment                                                                                                   | This study         |
| pQE80oriT-gvrA                            | pQE80oriT containing SD sequence and ORF of <i>gvrA</i> as a EcoRI-HindIII fragment                                                                                                   | This study         |
| pQE80oriT-gvrB                            | pQE80oriT containing SD sequence and ORF of <i>gvrB</i> as a BamHI-HindIII fragment                                                                                                   | This study         |
| pQE80oriT-gvrC                            | pQE80oriT containing SD sequence and ORF of <i>gvrC</i> as a EcoRI-HindIII fragment                                                                                                   | This study         |
| pQE80-SmaR                                | pQE80 plasmid containing SmaR, Ap <sup>R</sup>                                                                                                                                        | Slater et al. 2003 |
| pBLUEScript SK+                           | Cloning vector, ColE1 replicon, Ap <sup>R</sup>                                                                                                                                       | Stratagene         |
| pBluescript +gvpA1 5'RAC                  | pBLUEScript SK+ containing the product of 5'RACE beginning at the transcription start site of <i>gvpA1</i>                                                                            | This study         |
| pBluescript +gvrA 5'RACE                  | pBLUEScript SK+ containing the product of 5'RACE beginning at the transcription start site of <i>gvrA</i>                                                                             | This study         |
| pRW50                                     | promoterless <i>lacZ</i> reporter, Tet <sup>R</sup>                                                                                                                                   | Lodge et al. 1992  |
| pRW50- <i>gvpA1</i> <sub>pro</sub>        | pRW50 derivative containing <i>gvpA1</i> promoter as an EcoRI/HindIII fragment                                                                                                        | This study         |
| pRW50- <i>gvrA</i> <sub>pro</sub>         | pRW50 derivative containing <i>gvrA</i> promoter as an EcoRI/HindIII fragment                                                                                                         | This study         |
