# Supplementary material for: Molecular genetic and physical analysis of gas vesicles in buoyant enterobacteria
Source: PubMed Central journal article supplement (PMC4982088; doi:10.1111/1462-2920.13203), 2016-02-15
Supplement: EMI-18-1264-s004.pdf [file EMI-18-1264-s004.pdf]

Table S3 Oligonucleotides used in this study

| Oligonucleotide | Sequences (5'-3') (underlined is restriction enzyme site) |
|-----------------|-----------------------------------------------------------|
| gvpA1_5F_BamHI  | CGGGATCCATCCCTGTAATCTTGAC                                 |
| gvpA1_5R_XhoI   | ATTACGCCCTCGAGAGCCATGATGGCGTCTCC                          |
| gvpA1_3F_XhoI   | CATGGCTCTCGAGGCGTAATTAAGTAAGCAG                           |
| gvpA1_3R_SpeI   | CTACACTAGTGTGCCAAGTGCCAACG                                |
| gvpA2_5F_BamHI  | CGGGATCCGCTGATTTTGACAAAATCCG                              |
| gvpA2_5R_XhoI   | GTTACTCCCTCGAGTGGCATAATGTGTACGCTC                         |
| gvpA2_3F_XhoI   | TATGCCACTCGAGGAGTAACACTATGACAACC                          |
| gvpA2_3R_SpeI   | CTACACTAGTCTGGCGATATCGCTTGCG                              |
| gvpA3_5F_SalI   | ACGCGTCCGACGGCCGATTGCTGTAAGG                              |
| gvpA3_5R_XhoI   | AATCCTTACTCGAGGCTCATGGTGCAATCC                            |
| gvpA3_3F_XhoI   | ATGAGCCCTCGAGTAAGGATTATCTTTTTTATGCC                       |
| gvpA3_3R_SpeI   | CTACACTAGTATTGCTGTATGCCGATAC                              |
| gvpF1_5F_BamHI  | CGGGATCCCTAATCAGAGAGTTGCGTGG                              |
| gvpF1_5R_XhoI   | GTCAGACTCGAGAAATACTCATCATGCACTCC                          |
| gvpF1_3F_XhoI   | GAGTATTCTCGAGTCTGACTGAGGCTAAGCC                           |
| gvpF1_3R_SpeI   | CTACACTAGTGGCAATTTCATCCATGCC                              |
| gvpF2_5F_BamHI  | CGGGATCCCGGTTTGGATGACGTACG                                |
| gvpF2_5R_XhoI   | GTAGGCCCTCGAGTTCTGTGTTCATCGTCTAGC                         |
| gvpF2_3F_XhoI   | CACAGAACTCGAGGCGCTACAGTTTTTGCCAAC                         |
| gvpF2_3R_SpeI   | CTACACTAGTCTATGCAGTTTTCTCATCC                             |
| gvpF3_5F_BamHI  | CGGGATCCCTTTGCTGAAGTGATTGCCG                              |
| gvpF3_5R_XhoI   | GGGAGGCTCGAGGCGCTACAGTAGTAAGCTC                           |
| gvpF3_3F_XhoI   | GTACGGCTCGAGCCCTCCCTATAACTTCGCC                           |
| gvpF3_3R_SpeI   | CTACACTAGTCAAGTTCCTAATTTCCGACG                            |
| gvpC_5F_BamHI   | CGGGATCCCGTAAGGCGCACATCATGACC                             |
| gvpC_5R_XhoI    | GCTCGTCTCGAGACCGTCTGTTAAGCATCC                            |
| gvpC_3F_XhoI    | GACGGTCTCGAGACGAGCCTCGCAGTCTAGC                           |
| gvpC_3R_SpeI    | CTACACTAGTCTTGCAACATGGTAACGG                              |
| gvpG_5F_BamHI   | CGGGATCCATGCGCTCTGTGTTCG                                  |
| gvpG_5R_XhoI    | GTCTGCTCCGAGGATGTTCATCGATCAGCAGC                          |
| gvpG_3F_XhoI    | GACATCCTCGAGGACGACGACGAGGATGAGC                           |
| gvpG_3R_SpeI    | CTACACTAGTGGAAATAGTCGATTGACC                              |
| gvpK_5F_SalI    | ACGCGTCCGACGGATTAGATGAAATCATGG                            |
| gvpK_5R_XhoI    | GCCTAGCTCGAGATGGTGGCATAACTGTAAGG                          |
| gvpK_3F_XhoI    | CACCATCTCGAGCTAGGCCGATTGCTGTAAGG                          |
| gvpK_3R_SpeI    | CTACACTAGTGTGATGACAACCCCTTTGTCC                           |
| gvpN_5F_BamHI   | CGGGATCCACAGAGTGAAGAACGTGCC                               |
| gvpN_5R_XhoI    | GTAGTTCCTCGAGCTGCGAAACGGTATTTTG                           |
| gvpN_3F_XhoI    | TGCGAGCTCGAGGAACTACAGATACTGCATGC                          |
| gvpN_3R_SpeI    | CTACACTAGTATACGTCCAAAATCAGCG                              |
| gvpH_5F_BamHI   | CGGGATCCCGCGACTAAACCCATTCC                                |
| gvpH_5R_XhoI    | CCGTTCTCGAGCTGGTTTCCATCCAAACC                             |
| gvpH_3F_XhoI    | AACCAGCTCGAGGAACGGTCTTGCCGTAATGG                          |
| gvpH_3R_SpeI    | CTACACTAGTGTGATGGTAAAAAATGCG                              |
| gvpX_5F_SalI    | ACGCGTCCGACACTGTGCCAGGCAATCACG                            |
| gvpX_5R_XhoI    | GGATGTCTCGAGCCTCTGCCGAAACAGAC                             |
| gvpX_3F_XhoI    | CAGAGGCTCGAGACATCCATATAAGTTTACGG                          |
| gvpX_3R_SpeI    | CTACACTAGTCAACGCTTTGAGTTTTCGG                             |
| gvpV_5F_BamHI   | CGGGATCCACCATGTTGCAAGGTAACG                               |
| gvpV_5R_XhoI    | TGCGAACTCGAGGAGGACGAGTACTTATAGCC                          |
| gvpV_3F_XhoI    | CGTCCCTCTCGAGTTGCGAATCAAGTATTGAGG                         |
| gvpV_3R_SpeI    | CTACACTAGTGGTTTTCAATAATCTCTTCGC                           |
| gvpW_5F_BamHI   | CGGGATCCCCAATGCCAATAATCACCG                               |
| gvpW_5R_XhoI    | ACTCTCTCGAGCTTGGGATAAATAGCAGG                             |
| gvpW_3F_XhoI    | CCCAAGCTCGAGGAGAGTTCATTTGCTGTC                            |
| gvpW_3R_SpeI    | CTACACTAGTGTGCTGGCCAGTGTGC                                |
| gvpY_5F_SalI    | ACGCGTCCGACCAACGTTATGAACGAGATGG                           |
| gvpY_5R_XhoI    | CGGTTGCTCGAGAAATGGGAAAATGAATCAGC                          |
| gvpY_3F_XhoI    | CCCATCTCGAGCAACCGTTAGGTAAAAGGGG                           |
| gvpY_3R_SpeI    | CTACACTAGTATCATCGCCTAGACGGTGC                             |
| gvpZ_5F_BamHI   | CGGGATCCCTCCGACAAAAGAGTAGGG                               |
| gvpZ_5R_XhoI    | ACGCACCTCGAGTCTCTCAGACATGACTGGC                           |
| gvpZ_3F_XhoI    | GAAGAACTCGAGGTGCGTTGGGAAGATGTCGG                          |
| gvpZ_3R_SpeI    | CTACACTAGTCTATCGCCAAAACATTTCCGG                           |
| gvrA_5F_BamHI   | CGGGATCCGTTTGTAAAAGTATCGGC                                |
| gvrA_5R_XhoI    | GATCTTCTCGAGGTCACAAAATATCTTTGTCCG                         |
| gvrA_3F_XhoI    | TGTGACCTCGAGAAGATCAATGCAGCCGAGG                           |
| gvrA_3R_SpeI    | CTACACTAGTGAAGCGGGTTCAATCTGC                              |
| gvrB_5F_BamHI   | CGGGATCCCTGCTGACATTTGTTGAACG                              |
| gvrB_5R_XhoI    | CAGACACTCGAGTGACATGGTAGCCTGTCC                            |
| gvrB_3F_XhoI    | CATGTCACTCGAGTGTCTGGGTGAAGGTTCC                           |
| gvrB_3R_SpeI    | CTACACTAGTCTGGTTCTATGATCTGTGG                             |
| gvrC_5F_BamHI   | CGGGATCCCTGAAGGATGACTATGGGC                               |
| gvrC_5R_XhoI    | GTGTCTGCTCGAGAACTATCAGAATGGGTGC                           |
| gvrC_3F_XhoI    | GATAGTTCTCGAGCAGACACTATCACAGCCG                           |
| gvrC_3R_SpeI    | CTACACTAGTAGCGAACTGGAACGTACG                              |
| RTGL1           | ACCGTATTCTGGACAAAAG                                       |
| RTGL2           | GCCATACCGTCTGTTAAGC                                       |
| RTGL3           | AACGAGCCTCGCAGTCTAG                                       |
| RTGL4           | ACGGTATACTGCGAAACGG                                       |
| RTGL5           | ACCAATAGGTTTACAGACAG                                      |
| RTGL6           | ATTCCAGCCACCTATCTG                                        |
| RTGL7           | GTCTTCTGGTTTGCGAATC                                       |
| RTGL8           | TGGCACGATGATTTCTGG                                        |

Table S3 Oligonucleotides used in this study

|                |                                        |
|----------------|----------------------------------------|
| RTGVL9         | CTGGTACTCTCTCTGACTG                    |
| RTGVL10        | GACTCCAGTAAGAACTTGG                    |
| RTGVL11        | GCTAAAGACATTGGGTTCCG                   |
| RTGVL12        | TGTATTGCTGGCGATGTCCG                   |
| RTGVL13        | TTGACACATTTGTGCGACG                    |
| RTGVL14        | TTAACCATGGTACACACCC                    |
| RTGVL15        | ATATCCTTGAACCGCTTGG                    |
| RTGVL16        | GGTCGAATCGGTGAATGG                     |
| RTGVL17        | GAGTTGGAAGAACGCTCTGC                   |
| RTGVL18        | AGATACGCACGCGTTTGAG                    |
| RTgvp R        | AACGCCTCTGACATTATCGG                   |
| gvpA1F-EcoRI   | <u>GGAAATTC</u> TAGGAGACGCCATCATGGC    |
| gvpA1R-HindIII | CCC <u>AGCTT</u> TAATTACGCTGGAGTCGCTGC |
| gvpA2F-EcoRI   | <u>GGAAATTC</u> TGTGAGCGTACACATTATGC   |
| gvpA2R-HindIII | CCC <u>AGCTT</u> ACTCCCTACCGGGTAAACGG  |
| gvpA3F-EcoRI   | <u>GGAAATTC</u> TATAAGGATTTGCACCATGAGC |
| gvpA3R-HindIII | CCC <u>AGCTT</u> CCCTATAAAATGAGTTTCTTC |
| gvpCF-EcoRI    | <u>GGAAATTC</u> ATAAGGAGAATCCTATGGG    |
| gvpCR-HindIII  | CCC <u>AGCTT</u> GGCTAGACTGCGAGGCTCG   |
| gvpGF-EcoRI    | <u>GGAAATTC</u> TGAGGCTAAGCCATGCTGC    |
| gvpGR-HindIII  | CCC <u>AGCTT</u> TCATTTTCGTCGTACCCTCG  |
| gvpKF-EcoRI    | <u>GGAAATTC</u> GTAGGGAGTAACACTATGAC   |
| gvpKR-HindIII  | CCC <u>AGCTT</u> TTACAGCAATCGGCCTAGC   |
| gvpF1F-EcoRI   | <u>GGAAATTC</u> ATTGAGGAGTGCATGATGAG   |
| gvpF1R-HindIII | CCC <u>AGCTT</u> TCAGTCAGAGAGATTACCAG  |
| gvpF2F-EcoRI   | <u>GGAAATTC</u> TTGGCGATGATGCATGACG    |
| gvpF2R-Sall    | ACGCGTCGACTCATGATTCGTCAGGTTGG          |
| gvpF3F-EcoRI   | <u>GGAAATTC</u> CAACCTGACGAATCATGAGC   |
| gvpF3R-HindIII | CCC <u>AGCTT</u> TTAGCTGGCGAAGTTATAGG  |
| gvpNF-EcoRI    | <u>GGAAATTC</u> GCACAGGAGTATTCCATG     |
| gvpNR-HindIII  | CCC <u>AGCTT</u> TAGATAAATTACTCCACTGC  |
| gvpVF-EcoRI    | <u>GGAAATTC</u> AGTGGAGTAATTATCATGG    |
| gvpVR-HindIII  | CCC <u>AGCTT</u> AACTCAATACTTGATTCCG   |
| gvrAF-EcoRI    | <u>GGAAATTC</u> CCAATTGGATGTAGTCGATG   |
| gvrAR-HindIII  | CCC <u>AGCTT</u> CTACTCATGATTGTTTACC   |
| gvrBF-BamHI    | CGGGATCCTAACGACAGGCTACCATGTCAG         |
| gvrBR-HindIII  | CCC <u>AGCTT</u> TTAGAGTATAGGTAAGG     |
| gvrCF-EcoRI    | <u>GGAAATTC</u> ACCTATACTCTAAAATGATG   |
| gvrCR-HindIII  | CCC <u>AGCTT</u> CAACTACTCGCTCGGCTGTG  |
| oREM399        | GCTAATCAGGAGCGTTAATTGA                 |
| oREM400        | AGCAGGAGAGCGGTTGATA                    |
| oREM397        | AAGCTTTAAGTCTAACTACTGTTGAATTC          |
| oREM398        | GTTTAGGTTACTCATCGTTTTGG                |
